# Supplementary material
Source: PubMed Central journal article supplement (PMC4926974)
Supplement: ASN.2015050472_ASN2015050472SupplementaryData.pdf [file ASN.2015050472_ASN2015050472SupplementaryData.pdf]

## **SUPPLEMENTARY MATERIALS**

### **Racial and Ethnic Disparities in Utilization of and Outcomes with Home Dialysis in the United States**

Mehrotra R, Soohoo M, Rivara M, Himmelfarb JH, Cheung AK, Arah OA, Nissenson AR, Ravel V, Streja E, Kuttykrishnan S, Katz R, Molnar MZ, Kalantar-Zadeh K.

**S. Figure 1:** Consort diagram summarizing the inclusion and exclusion criteria used to constitute the cohort for analysis. Of the 20,196 patients ever treated with PD or home HD, 131 were treated with PD as well as home HD at different points in time.

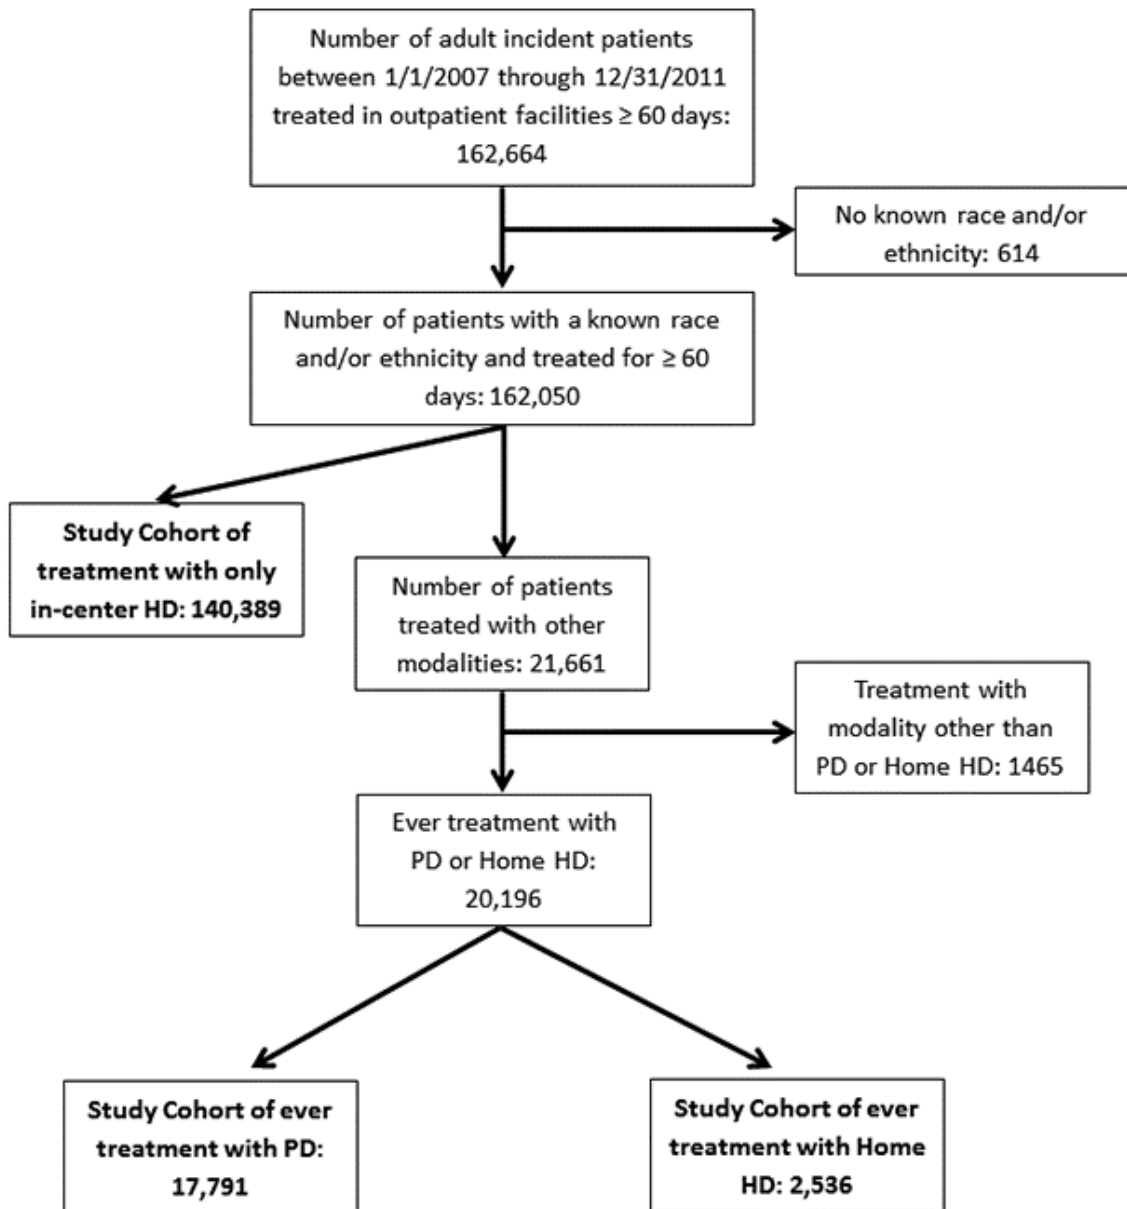

**Supplemental Table 1** Odds ratio for treatment with peritoneal dialysis or home hemodialysis of individuals of different race/ethnicity

| Race/Ethnicity | Peritoneal Dialysis           |                                            | Home Hemodialysis             |                                            |
|----------------|-------------------------------|--------------------------------------------|-------------------------------|--------------------------------------------|
|                | Unadjusted Odds Ratio (95%CI) | Adjusted Odds Ratio (95%CI) <sup>(1)</sup> | Unadjusted Odds Ratio (95%CI) | Adjusted Odds Ratio (95%CI) <sup>(1)</sup> |
| White          | Reference                     | Reference                                  | Reference                     | Reference                                  |
| Black          | 0.64 (0.61, 0.66)             | 0.53 (0.50, 0.56)                          | 0.49 (0.44, 0.54)             | 0.40 (0.36, 0.44)                          |
| Hispanic       | 0.74 (0.71, 0.78)             | 0.57 (0.53, 0.61)                          | 0.27 (0.23, 0.32)             | 0.25 (0.21, 0.30)                          |
| Asian          | 1.01 (0.99, 1.10)             | 0.82 (0.72, 0.93)                          | 0.49 (0.38, 0.64)             | 0.53 (0.41, 0.69)                          |
| Other          | 0.80 (0.73, 0.87)             | 0.60 (0.52, 0.68)                          | 0.45 (0.35, 0.59)             | 0.44 (0.33, 0.57)                          |

<sup>(1)</sup> Adjusted for age, gender, primary health insurance, geographic location at the time of starting treatment with the modality, incidence year, cause of ESRD, history of previous transplant, presence of diabetes, hypertension, congestive heart failure, atherosclerotic heart disease, other cardiovascular disease, access type at the time of first dialysis.

**Supplemental Table 2** Baseline characteristics of patients, stratified by race/ethnicity, treated with in-center hemodialysis

|                                      | <b>White</b> | <b>Black</b> | <b>Hispanic</b> | <b>Asian</b> | <b>Other</b> |
|--------------------------------------|--------------|--------------|-----------------|--------------|--------------|
| No. of subjects                      | 67,026       | 43,007       | 20,596          | 4,727        | 5,033        |
| Age, years                           | 66 ± 14      | 58 ± 15      | 59 ± 15         | 63 ± 15      | 60 ± 15      |
| % Male                               | 59           | 53           | 58              | 56           | 56           |
| Primary Health Insurance, %          |              |              |                 |              |              |
| Medicare                             | 60           | 52           | 48              | 47           | 51           |
| Medicaid                             | 4            | 7            | 13              | 9            | 7            |
| Initially Uninsured                  | 3            | 4            | 6               | 4            | 5            |
| Veterans Affairs                     | 1            | 1            | 1               | <1           | 1            |
| Other*                               | 33           | 36           | 33              | 39           | 36           |
| Cause of ESRD, %                     |              |              |                 |              |              |
| Diabetes                             | 43           | 42           | 60              | 49           | 56           |
| Hypertension                         | 26           | 39           | 22              | 29           | 23           |
| Glomerular Disease                   | 11           | 9            | 7               | 10           | 8            |
| Other                                | 20           | 10           | 11              | 12           | 13           |
| h/o previous transplant, %           | 2            | 1            | 1               | 1            | 1            |
| Comorbidities, %                     |              |              |                 |              |              |
| Diabetes                             | 53           | 56           | 65              | 56           | 64           |
| Hypertension                         | 48           | 60           | 44              | 47           | 44           |
| Congestive Heart Failure             | 36           | 35           | 37              | 35           | 36           |
| Atherosclerotic Heart Disease        | 16           | 12           | 12              | 9            | 12           |
| Other Cardiovascular                 | 18           | 13           | 11              | 9            | 12           |
| Dyslipidemia                         | 26           | 23           | 22              | 25           | 24           |
| Access Type at start of in-center HD |              |              |                 |              |              |
| Central Venous Catheter              | 68           | 69           | 73              | 66           | 70           |
| AV Fistula                           | 19           | 15           | 16              | 19           | 18           |
| AV Graft                             | 4            | 7            | 3               | 5            | 4            |

|                                                                            | White               | Black              | Hispanic            | Asian              | Other              |
|----------------------------------------------------------------------------|---------------------|--------------------|---------------------|--------------------|--------------------|
| Unknown                                                                    | 9                   | 9                  | 8                   | 10                 | 8                  |
| Baseline Body Mass Index, kg/m <sup>2</sup>                                | 28 ± 7              | 29 ± 8             | 28 ± 6              | 24 ± 5             | 28 ± 7             |
| Lab Variables from the first 91-days period of treatment with in-center HD |                     |                    |                     |                    |                    |
| Hemoglobin, g/dL                                                           | 11.2 ± 1.2          | 10.9 ± 1.2         | 11.3 ± 1.2          | 11.2 ± 1.2         | 11.2 ± 1.1         |
| Iron Saturation, %                                                         | 22 [17, 27]         | 22 [18, 28]        | 23 [18, 28]         | 24 [19, 30]        | 22 [18, 28]        |
| Serum Ferritin, ng/mL                                                      | 293 [169, 512]      | 315 [178, 556]     | 280 [159, 491]      | 376 [213, 644]     | 318 [174, 539]     |
| Serum Albumin, g/dL                                                        | 3.5 ± 0.5           | 3.5 ± 0.5          | 3.5 ± 0.5           | 3.6 ± 0.5          | 3.5 ± 0.5          |
| Serum Calcium, mg/dl                                                       | 8.7 ± 0.6           | 8.7 ± 0.7          | 8.5 ± 0.6           | 8.6 ± 0.6          | 8.6 ± 0.6          |
| Serum Phosphorous, mg/dL                                                   | 4.9 ± 1.2           | 4.9 ± 1.2          | 5.1 ± 1.2           | 5.0 ± 1.2          | 5.1 ± 1.3          |
| Parathyroid hormone, pg/mL                                                 | 262 [163, 401]      | 400 [254, 610]     | 324 [212, 485]      | 296 [194, 431]     | 318 [205, 471]     |
| Alkaline phosphatase, IU/L                                                 | 85 [67, 112]        | 86 [68, 115]       | 95 [75, 124]        | 82 [65, 106]       | 89 [70, 117]       |
| Hemoglobin A1C, %                                                          | 6.2 [5.6, 7.0]      | 6.2 [5.6, 7.1]     | 6.4 [5.7, 7.3]      | 6.2 [5.7, 7.0]     | 6.3 [5.7, 7.2]     |
| Potassium, meq/L                                                           | 4.5 ± 0.5           | 4.3 ± 0.5          | 4.6 ± 0.6           | 4.5 ± 0.5          | 4.5 ± 0.5          |
| Bicarbonate, meq/L                                                         | 24 ± 3              | 24 ± 3             | 23 ± 3              | 23 ± 3             | 23 ± 3             |
| IV medication from the first 91-days period of treatment with in-center HD |                     |                    |                     |                    |                    |
| Cumulative Iron, mg/month                                                  | 800 [ 200, 1300]    | 800 [175, 1350]    | 800 [200, 1300]     | 600 [100, 1200]    | 800 [175, 1300]    |
| ESA Median Week Dose, units                                                | 4620 [ 1467, 11880] | 4644 [1466, 11826] | 4491 [ 1328, 11338] | 4708 [1540, 11733] | 4714 [1523, 11739] |
| Geographic Location, %                                                     |                     |                    |                     |                    |                    |
| Northeast                                                                  | 15                  | 12                 | 7                   | 8                  | 7                  |
| Midwest                                                                    | 26                  | 17                 | 5                   | 9                  | 9                  |
| West                                                                       | 22                  | 11                 | 52                  | 67                 | 49                 |
| South                                                                      | 37                  | 60                 | 35                  | 16                 | 35                 |
| Year of Incidence, %                                                       |                     |                    |                     |                    |                    |
| 2007                                                                       | 21                  | 22                 | 21                  | 20                 | 23                 |
| 2008                                                                       | 21                  | 21                 | 21                  | 20                 | 24                 |

|      | <b>White</b> | <b>Black</b> | <b>Hispanic</b> | <b>Asian</b> | <b>Other</b> |
|------|--------------|--------------|-----------------|--------------|--------------|
| 2009 | 21           | 21           | 21              | 22           | 19           |
| 2010 | 20           | 20           | 20              | 22           | 20           |
| 2011 | 16           | 15           | 16              | 17           | 14           |

Data are presented as mean  $\pm$  standard deviation, median [Interquartile range] or proportion where appropriate

\*Includes Medicare Advantage plans, managed care Medicaid, and employer-based health insurance

**Supplemental Table 3** Events rates and hazards ratio for all-cause mortality by race/ethnicity in patients treated with different dialysis modalities

| Race/ Ethnicity            | N      | Events | Event rate,<br>per 1000<br>patient-year | Hazards Ratio (95% confidence interval) |                                                                |                                          |
|----------------------------|--------|--------|-----------------------------------------|-----------------------------------------|----------------------------------------------------------------|------------------------------------------|
|                            |        |        |                                         | Unadjusted                              | Primary Analysis<br>(Adjusted for<br>age, gender,<br>diabetes) | Sensitivity Analysis<br>(Fully Adjusted) |
| <b>Peritoneal Dialysis</b> |        |        |                                         |                                         |                                                                |                                          |
| White                      | 10,123 | 1,675  | 127                                     | Reference                               | Reference                                                      | Reference                                |
| Black                      | 4,094  | 326    | 57                                      | 0.44 (0.39, 0.49)                       | 0.63 (0.56, 0.71)                                              | 0.54 (0.47, 0.61)                        |
| Hispanic                   | 2,263  | 197    | 60                                      | 0.48 (0.41, 0.55)                       | 0.64 (0.55, 0.75)                                              | 0.58 (0.50, 0.68)                        |
| Asian                      | 1,130  | 59     | 52                                      | 0.43 (0.33, 0.56)                       | 0.49 (0.38, 0.64)                                              | 0.51 (0.39, 0.67)                        |
| Other                      | 598    | 69     | 78                                      | 0.64 (0.50, 0.81)                       | 0.75 (0.59, 0.95)                                              | 0.73 (0.57, 0.93)                        |
| <b>Home Hemodialysis</b>   |        |        |                                         |                                         |                                                                |                                          |
| White                      | 1,753  | 177    | 89                                      | Reference                               | Reference                                                      | Reference                                |
| Black                      | 525    | 23     | 39                                      | 0.43 (0.28, 0.67)                       | 0.57 (0.37, 0.89)                                              | 0.52 (0.32, 0.84)                        |
| Hispanic                   | 139    | 10     | 71                                      | 0.74 (0.39, 1.39)                       | 0.85 (0.45, 1.60)                                              | 0.73 (0.39, 1.36)                        |
| Asian                      | 61     | 3      | 37                                      | 0.45 (0.15, 1.38)                       | 0.58 (0.19, 1.77)                                              | 0.51 (0.16, 1.60)                        |
| Other                      | 58     | 2      | 29                                      | 0.34 (0.08, 1.36)                       | 0.37 (0.09, 1.48)                                              | 0.32 (0.08, 1.29)                        |

| <b>In-Center Hemodialysis</b> |        |        |     |                   |                   |                   |
|-------------------------------|--------|--------|-----|-------------------|-------------------|-------------------|
| White                         | 67,026 | 19,800 | 200 | Reference         | Reference         | Reference         |
| Black                         | 43,007 | 8,705  | 114 | 0.58 (0.56, 0.59) | 0.73 (0.72, 0.75) | 0.69 (0.67, 0.71) |
| Hispanic                      | 20,596 | 3,595  | 99  | 0.50 (0.48, 0.51) | 0.62 (0.60, 0.64) | 0.58 (0.56, 0.60) |
| Asian                         | 4,727  | 838    | 104 | 0.52 (0.49, 0.56) | 0.55 (0.52, 0.59) | 0.51 (0.47, 0.55) |
| Other                         | 5,033  | 999    | 112 | 0.56 (0.53, 0.60) | 0.67 (0.63, 0.71) | 0.63 (0.59, 0.67) |

Adjustment for age, gender, primary health insurance, geographic location at the time of starting PD, home HD, or in-center HD, incidence year, cause of ESRD, history of previous transplant, presence of diabetes, hypertension, congestive heart failure, atherosclerotic heart disease, other cardiovascular disease, laboratory variables from the first 91-day period of start of PD, home HD, or in-center HD (hemoglobin, calcium, phosphorous, parathyroid hormone, ferritin, iron saturation, CO<sub>2</sub>, potassium), and modality-specific variables (PD: weekly total Kt/V<sub>urea</sub>, weekly residual renal Kt/V<sub>urea</sub>, use of automated PD, and 4-hour dialysate-to-plasma creatinine; home HD: access type in the first 91-day period of therapy, and urea reduction ratio). Body mass index was available and included in analyses for in-center or home HD; interval from date of first dialysis to start of PD or home HD was included for analyses of outcomes for patients treated with PD and home HD, respectively.



**Supplemental Table 4** Events rates and hazards ratio for transfer to in-center hemodialysis by race/ethnicity in patients treated with different dialysis modalities

| Race/ Ethnicity            | N      | Events | Event rate,<br>per 1000<br>patient-year | Hazards Ratio (95% confidence interval) |                                                                |                                          |
|----------------------------|--------|--------|-----------------------------------------|-----------------------------------------|----------------------------------------------------------------|------------------------------------------|
|                            |        |        |                                         | Unadjusted                              | Primary Analysis<br>(Adjusted for<br>age, gender,<br>diabetes) | Sensitivity Analysis<br>(Fully Adjusted) |
| <b>Peritoneal Dialysis</b> |        |        |                                         |                                         |                                                                |                                          |
| White                      | 10,123 | 1,606  | 122                                     | Reference                               | Reference                                                      | Reference                                |
| Black                      | 4,094  | 925    | 161                                     | 1.46 (1.35, 1.58)                       | 1.37 (1.26, 1.49)                                              | 1.24 (1.13, 1.36)                        |
| Hispanic                   | 2,263  | 423    | 128                                     | 1.17 (1.05, 1.30)                       | 1.07 (0.96, 1.19)                                              | 1.02 (0.91, 1.14)                        |
| Asian                      | 1,130  | 94     | 83                                      | 0.76 (0.62, 0.93)                       | 0.74 (0.60, 0.91)                                              | 0.77 (0.62, 0.95)                        |
| Other                      | 598    | 90     | 101                                     | 0.91 (0.73, 1.12)                       | 0.86 (0.69, 1.06)                                              | 0.81 (0.66, 1.00)                        |
| <b>Home Hemodialysis</b>   |        |        |                                         |                                         |                                                                |                                          |
| White                      | 1,753  | 282    | 142                                     | Reference                               | Reference                                                      | Reference                                |
| Black                      | 525    | 109    | 184                                     | 1.40 (1.12, 1.74)                       | 1.41 (1.12, 1.77)                                              | 1.65 (1.28, 2.13)                        |
| Hispanic                   | 139    | 29     | 205                                     | 1.49 (1.00, 2.21)                       | 1.45 (0.97, 2.16)                                              | 1.46 (0.95, 2.23)                        |
| Asian                      | 61     | 6      | 74                                      | 0.56 (0.25, 1.26)                       | 0.56 (0.25, 1.28)                                              | 0.47 (0.20, 1.12)                        |
| Other                      | 58     | 10     | 146                                     | 1.12 (0.59, 2.13)                       | 1.13 (0.60, 2.14)                                              | 1.14 (0.59, 2.20)                        |

Adjustment for age, gender, primary health insurance, geographic location at the time of starting PD, home HD, or in-center HD, incidence year, cause of ESRD, history of previous transplant, presence of diabetes, hypertension, congestive heart failure, atherosclerotic heart disease, other cardiovascular disease, laboratory variables from the first 91-day period of start of PD, home HD, or in-center HD (hemoglobin, calcium, phosphorous, parathyroid hormone, ferritin, iron saturation, CO<sub>2</sub>, potassium), and modality-specific variables (PD: weekly total Kt/V<sub>urea</sub>, weekly residual renal Kt/V<sub>urea</sub>, use of automated PD, and 4-hour dialysate-to-plasma creatinine; home HD: access type in the first 91-day period of therapy, and urea reduction ratio). Body mass index was available and included in analyses for in-center or home HD; interval from date of first dialysis to start of PD or home HD was included for analyses of outcomes for patients treated with PD and home HD, respectively.

**Supplemental Table 5** Events rates and hazards ratio for transplantation by race/ethnicity in patients treated with different dialysis modalities

| Race/ Ethnicity            | N      | Events | Event rate,<br>per 1000<br>patient-year | Hazards Ratio (95% confidence interval) |                                                                |                                          |
|----------------------------|--------|--------|-----------------------------------------|-----------------------------------------|----------------------------------------------------------------|------------------------------------------|
|                            |        |        |                                         | Unadjusted                              | Primary Analysis<br>(Adjusted for<br>age, gender,<br>diabetes) | Sensitivity Analysis<br>(Fully Adjusted) |
| <b>Peritoneal Dialysis</b> |        |        |                                         |                                         |                                                                |                                          |
| White                      | 10,123 | 885    | 67                                      | Reference                               | Reference                                                      | Reference                                |
| Black                      | 4,094  | 275    | 48                                      | 0.74 (0.64, 0.84)                       | 0.54 (0.47, 0.62)                                              | 0.66 (0.57, 0.76)                        |
| Hispanic                   | 2,263  | 150    | 45                                      | 0.73 (0.61, 0.86)                       | 0.52 (0.44, 0.62)                                              | 0.67 (0.55, 0.80)                        |
| Asian                      | 1,130  | 74     | 65                                      | 1.12 (0.89, 1.42)                       | 0.88 (0.69, 1.12)                                              | 0.90 (0.69, 1.16)                        |
| Other                      | 598    | 51     | 57                                      | 0.94 (0.71, 1.24)                       | 0.77 (0.58, 1.03)                                              | 0.85 (0.63, 1.15)                        |
| <b>Home Hemodialysis</b>   |        |        |                                         |                                         |                                                                |                                          |
| White                      | 1,753  | 165    | 83                                      | Reference                               | Reference                                                      | Reference                                |
| Black                      | 525    | 35     | 59                                      | 0.71 (0.50, 1.02)                       | 0.57 (0.40, 0.83)                                              | 0.63 (0.41, 0.98)                        |
| Hispanic                   | 139    | 12     | 85                                      | 0.97 (0.54, 1.74)                       | 0.84 (0.46, 1.53)                                              | 0.78 (0.41, 1.48)                        |
| Asian                      | 61     | 6      | 77                                      | 1.01 (0.45, 2.27)                       | 0.81 (0.36, 1.83)                                              | 0.67 (0.30, 1.53)                        |
| Other                      | 58     | 3      | 44                                      | 0.56 (0.18, 1.73)                       | 0.51 (0.16, 1.62)                                              | 0.55 (0.17, 1.74)                        |

| <b>In-Center Hemodialysis</b> |        |       |    |                   |                   |                   |
|-------------------------------|--------|-------|----|-------------------|-------------------|-------------------|
| White                         | 67,026 | 2,498 | 25 | Reference         | Reference         | Reference         |
| Black                         | 43,007 | 1,064 | 14 | 0.61 (0.57, 0.66) | 0.39 (0.36, 0.42) | 0.46 (0.42, 0.49) |
| Hispanic                      | 20,596 | 654   | 18 | 0.81 (0.74, 0.88) | 0.52 (0.49, 0.58) | 0.63 (0.57, 0.69) |
| Asian                         | 4,727  | 169   | 21 | 0.94 (0.81, 1.10) | 0.78 (0.66, 0.91) | 0.81 (0.68, 0.95) |
| Other                         | 5,033  | 195   | 22 | 0.97 (0.84, 1.12) | 0.70 (0.61, 0.82) | 0.78 (0.67, 0.91) |

Adjustment for age, gender, primary health insurance, geographic location at the time of starting PD, home HD, or in-center HD, incidence year, cause of ESRD, history of previous transplant, presence of diabetes, hypertension, congestive heart failure, atherosclerotic heart disease, other cardiovascular disease, laboratory variables from the first 91-day period of start of PD, home HD, or in-center HD (hemoglobin, calcium, phosphorous, parathyroid hormone, ferritin, iron saturation, CO<sub>2</sub>, potassium), and modality-specific variables (PD: weekly total Kt/V<sub>urea</sub>, weekly residual renal Kt/V<sub>urea</sub>, use of automated PD, and 4-hour dialysate-to-plasma creatinine; home HD: access type in the first 91-day period of therapy, and urea reduction ratio). Body mass index was available and included in analyses for in-center or home HD; interval from date of first dialysis to start of PD or home HD was included for analyses of outcomes for patients treated with PD and home HD, respectively.
